# Supplementary material
Source: PubMed Central journal article supplement (PMC5663361)

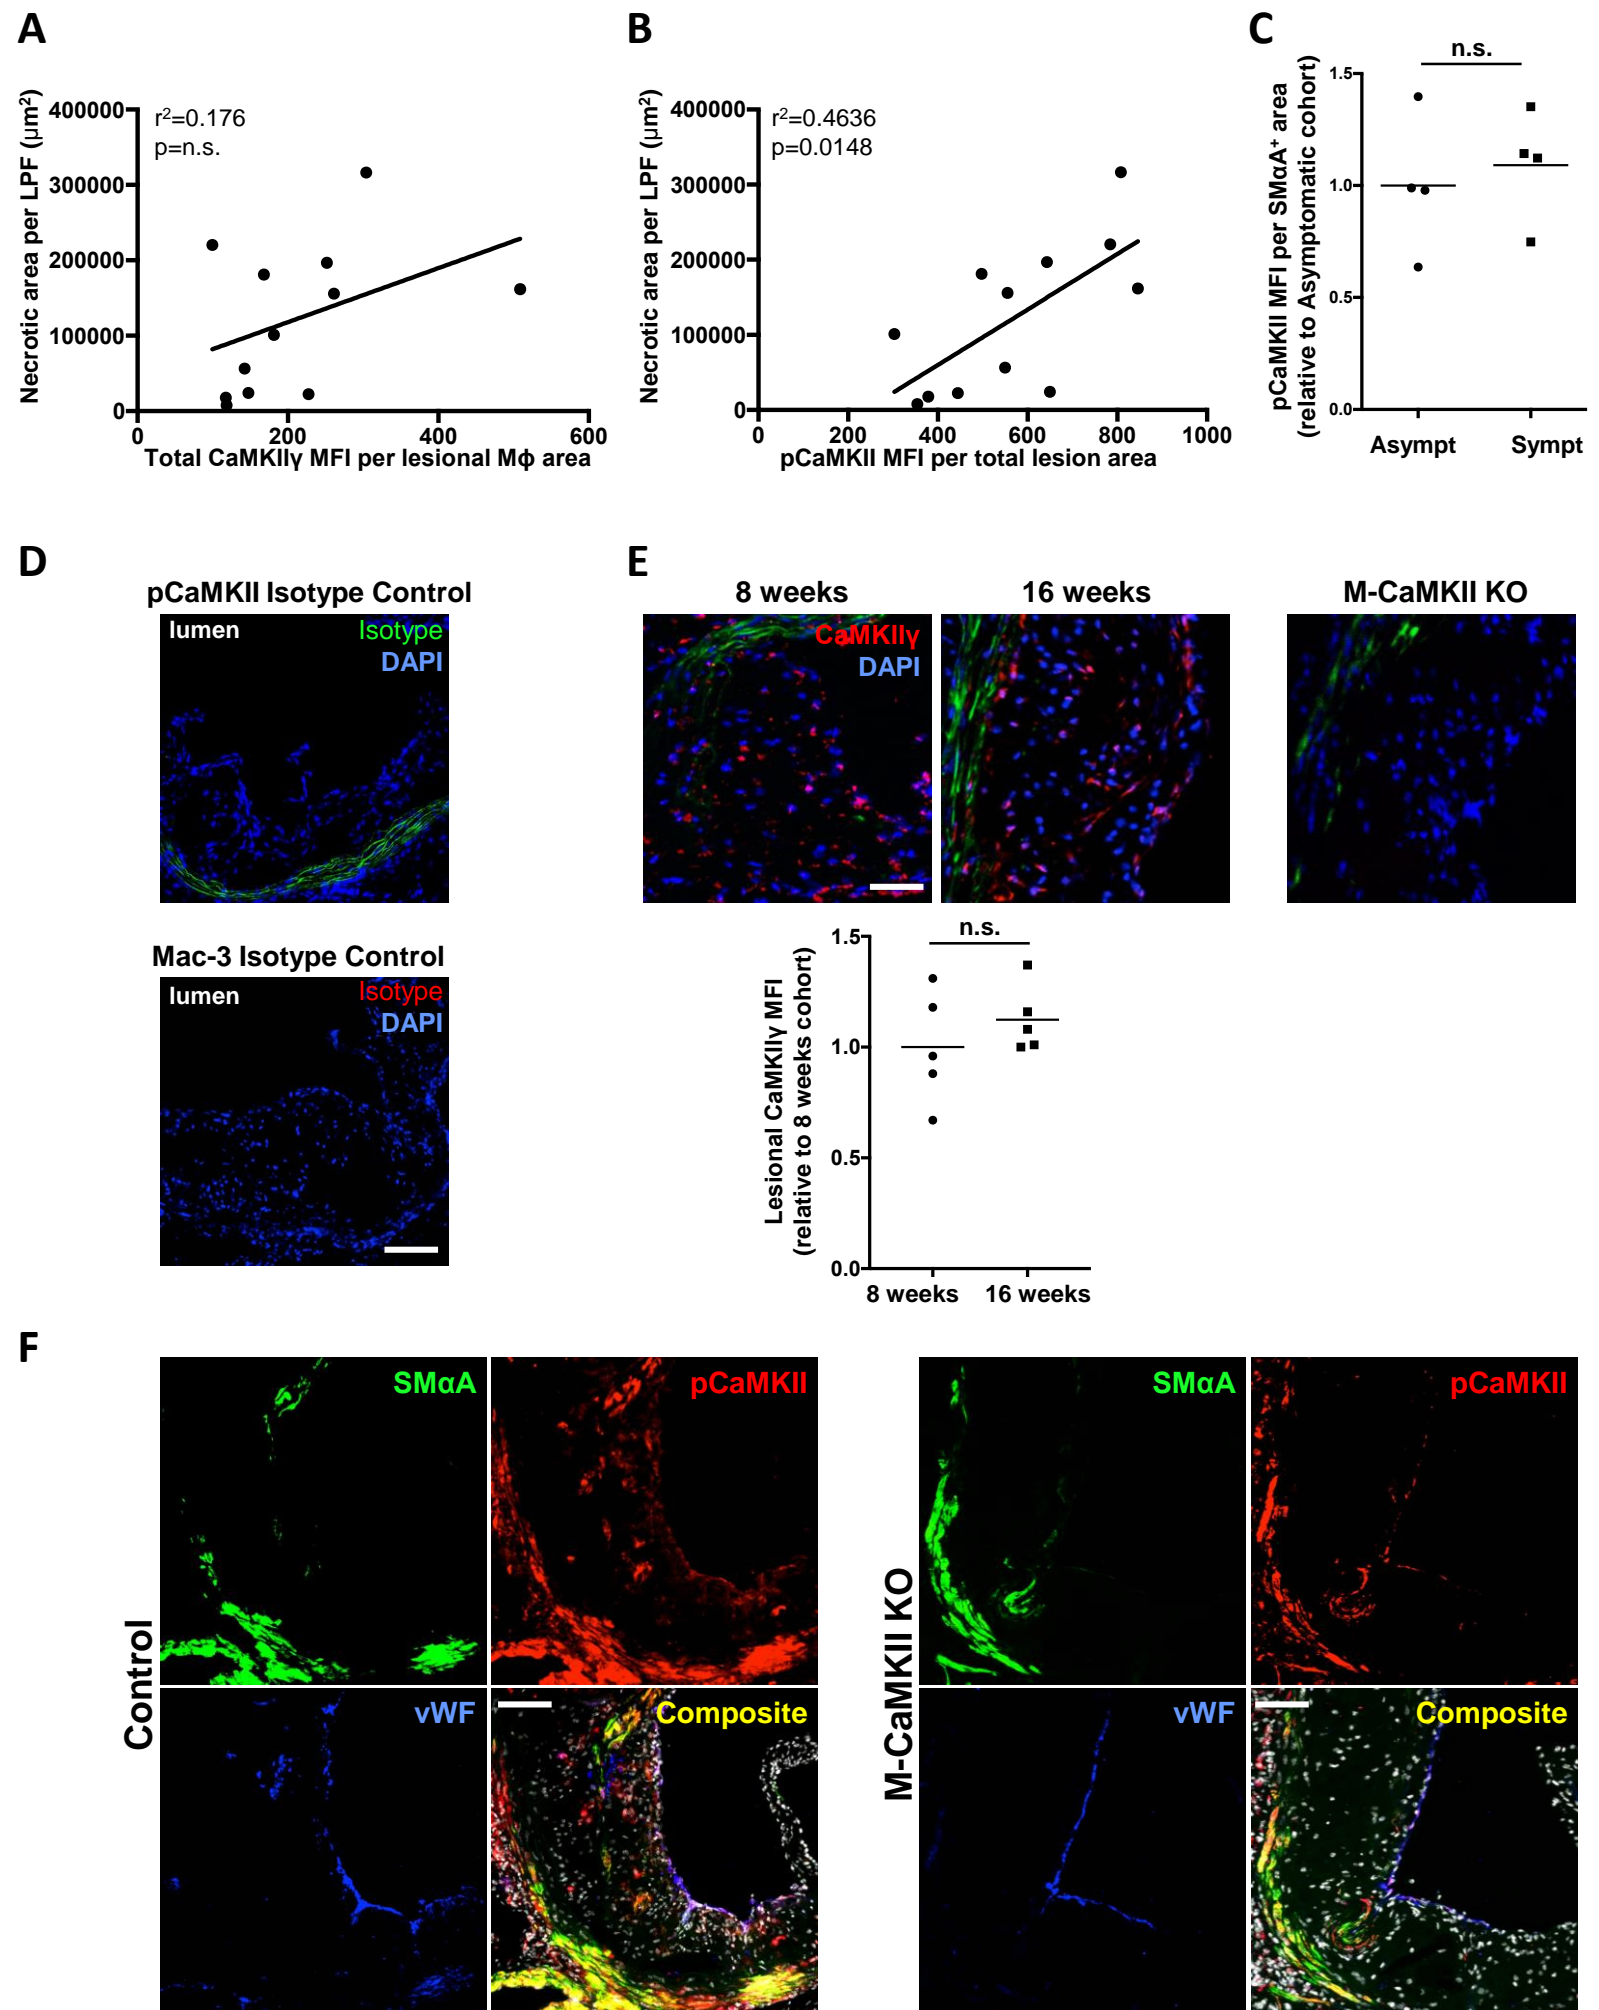

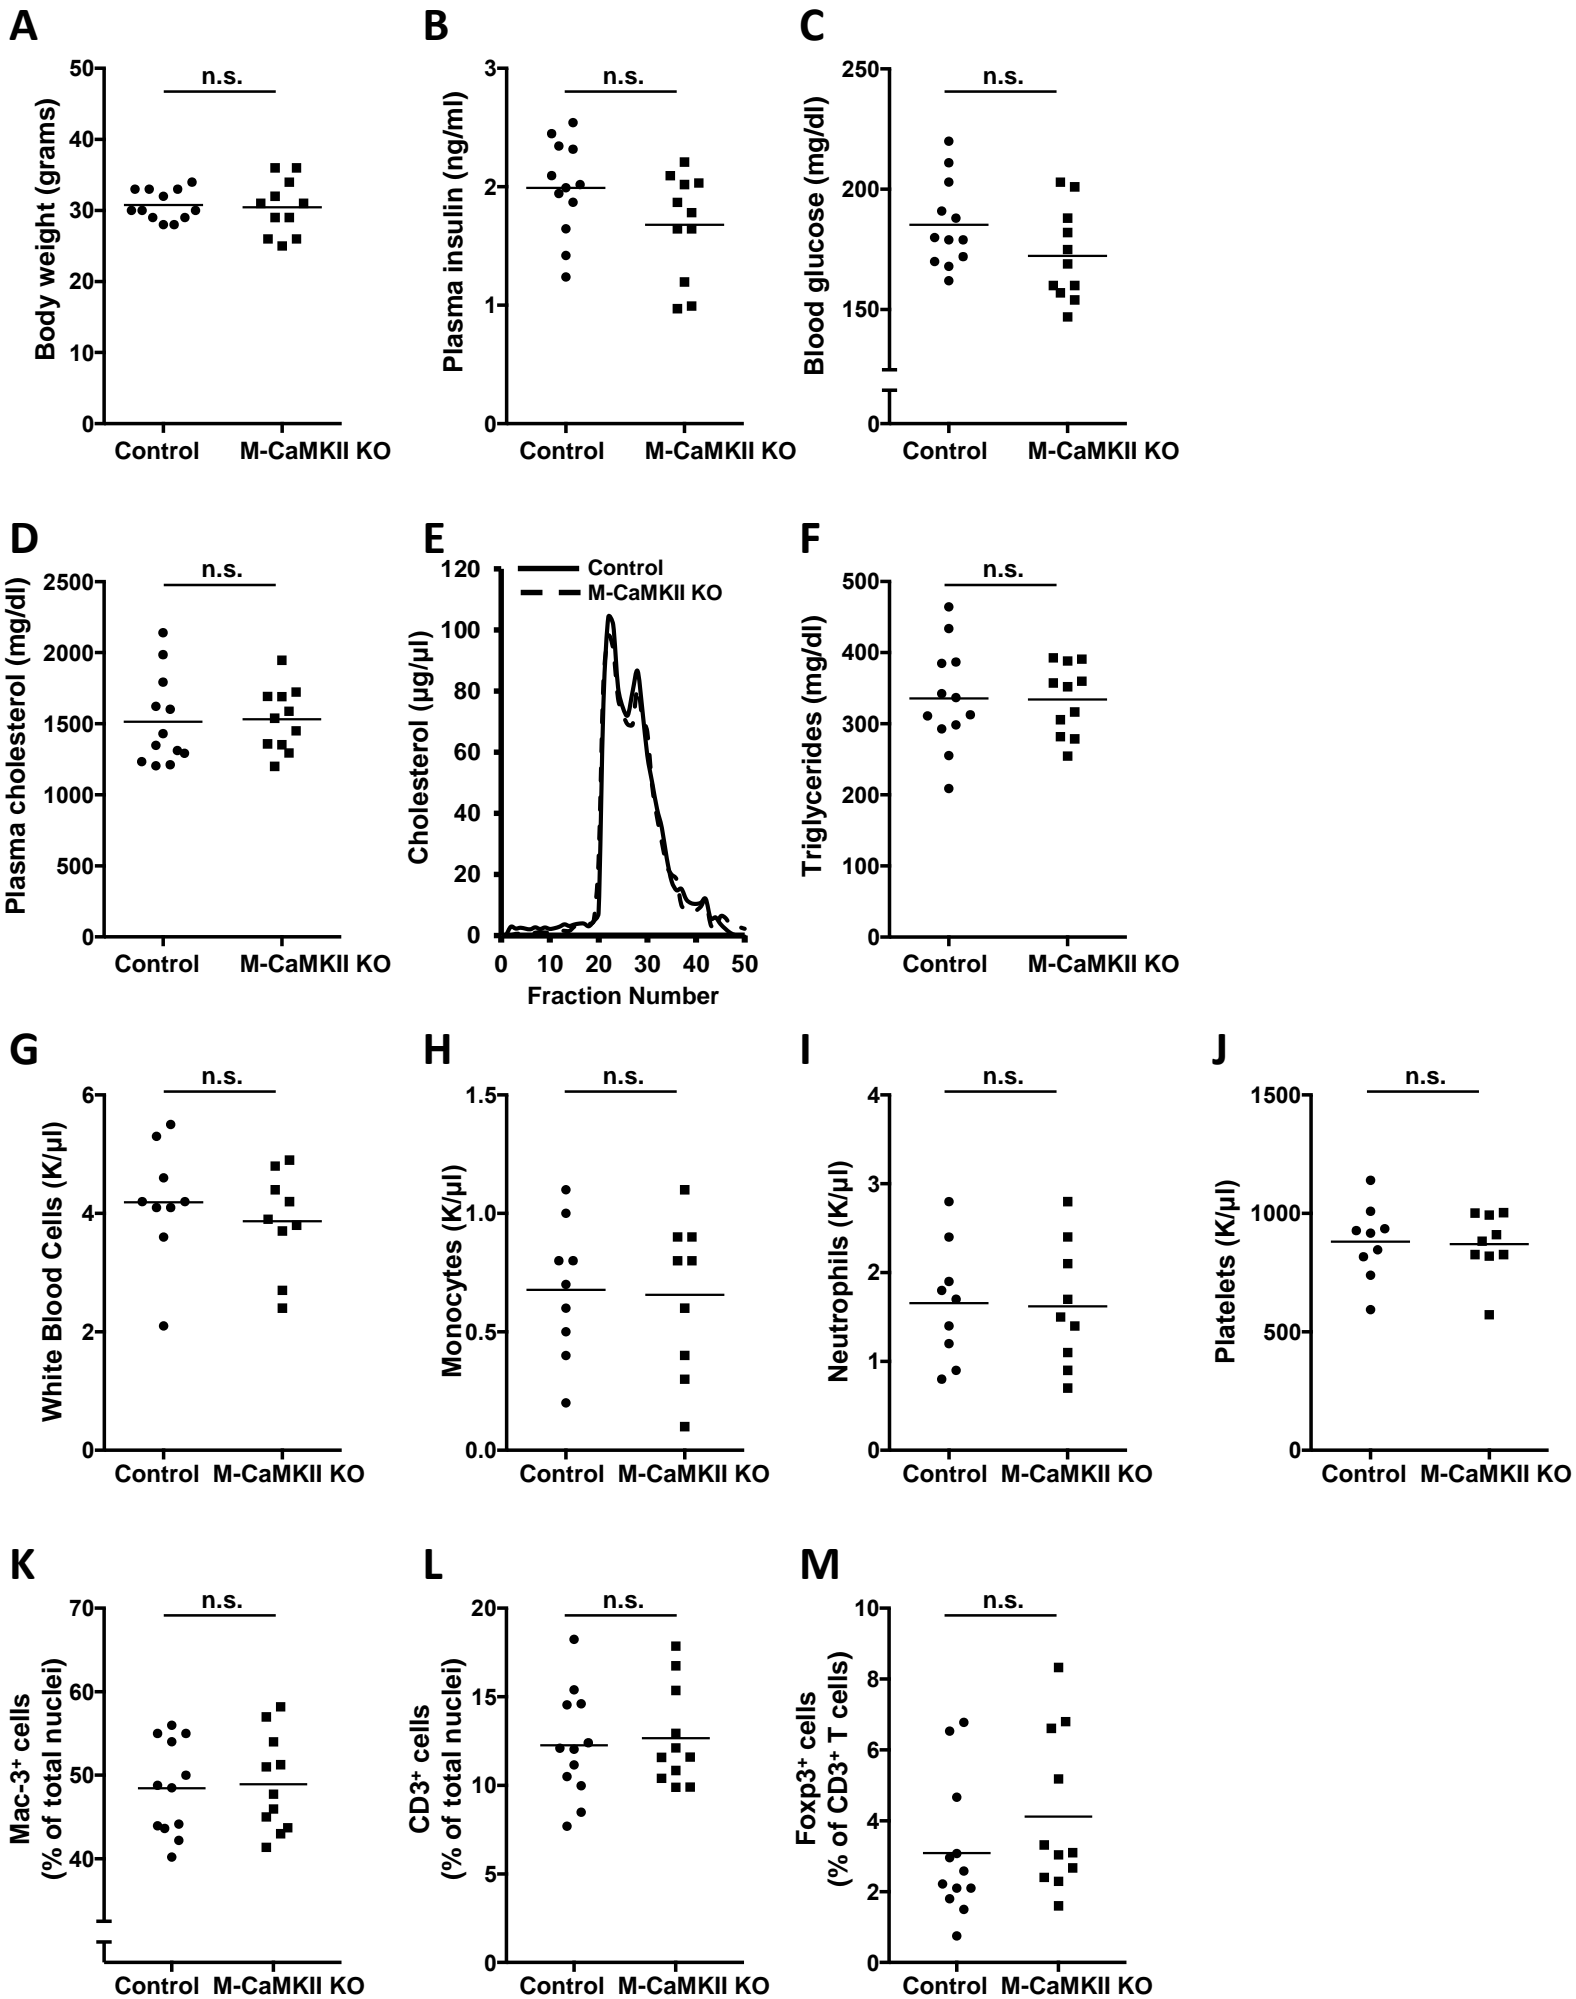

**A**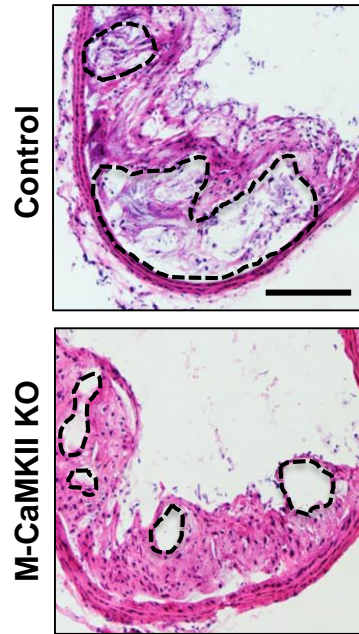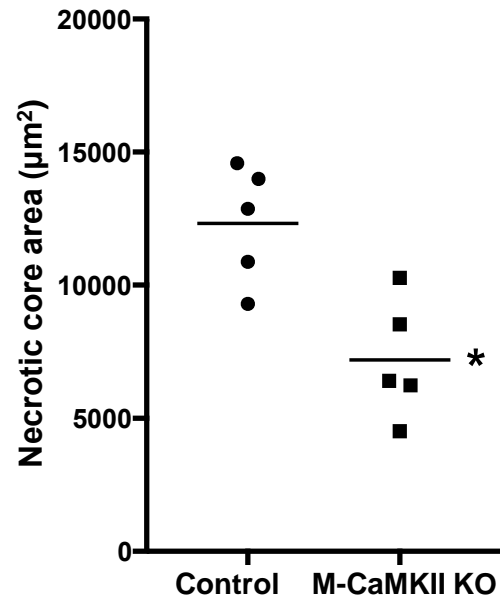**B**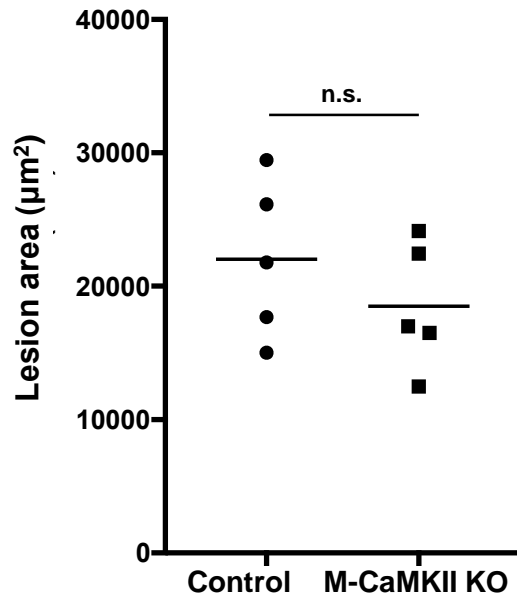**C**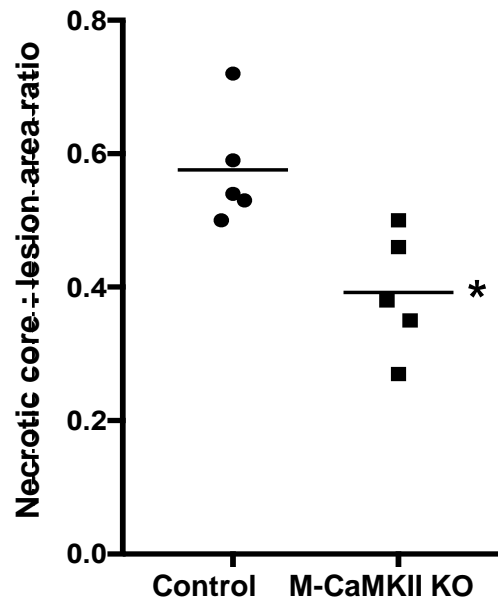

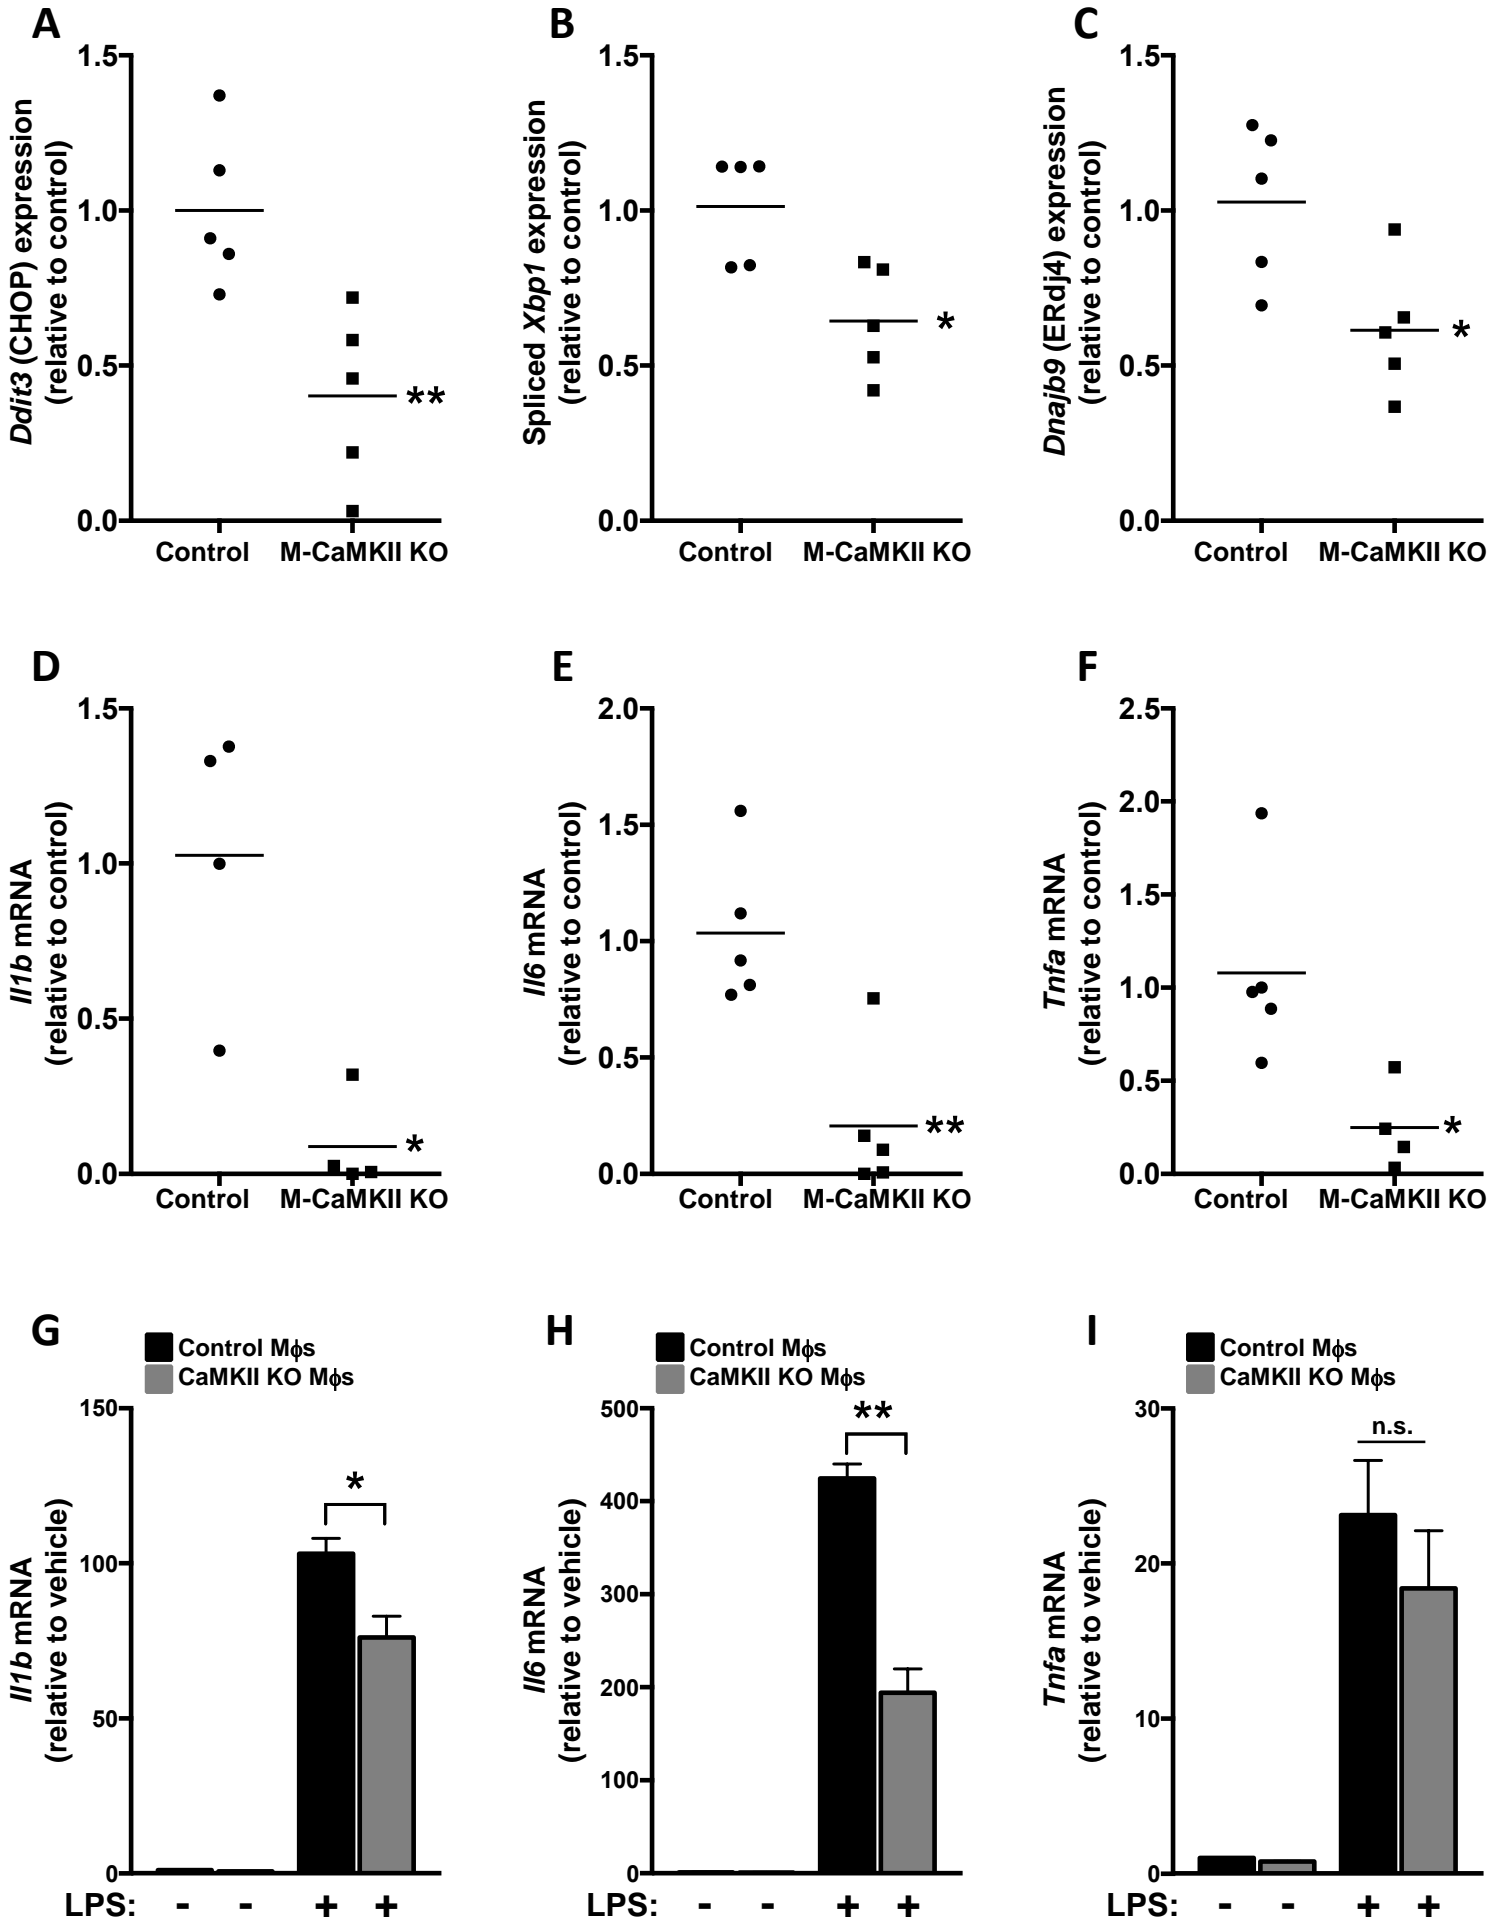

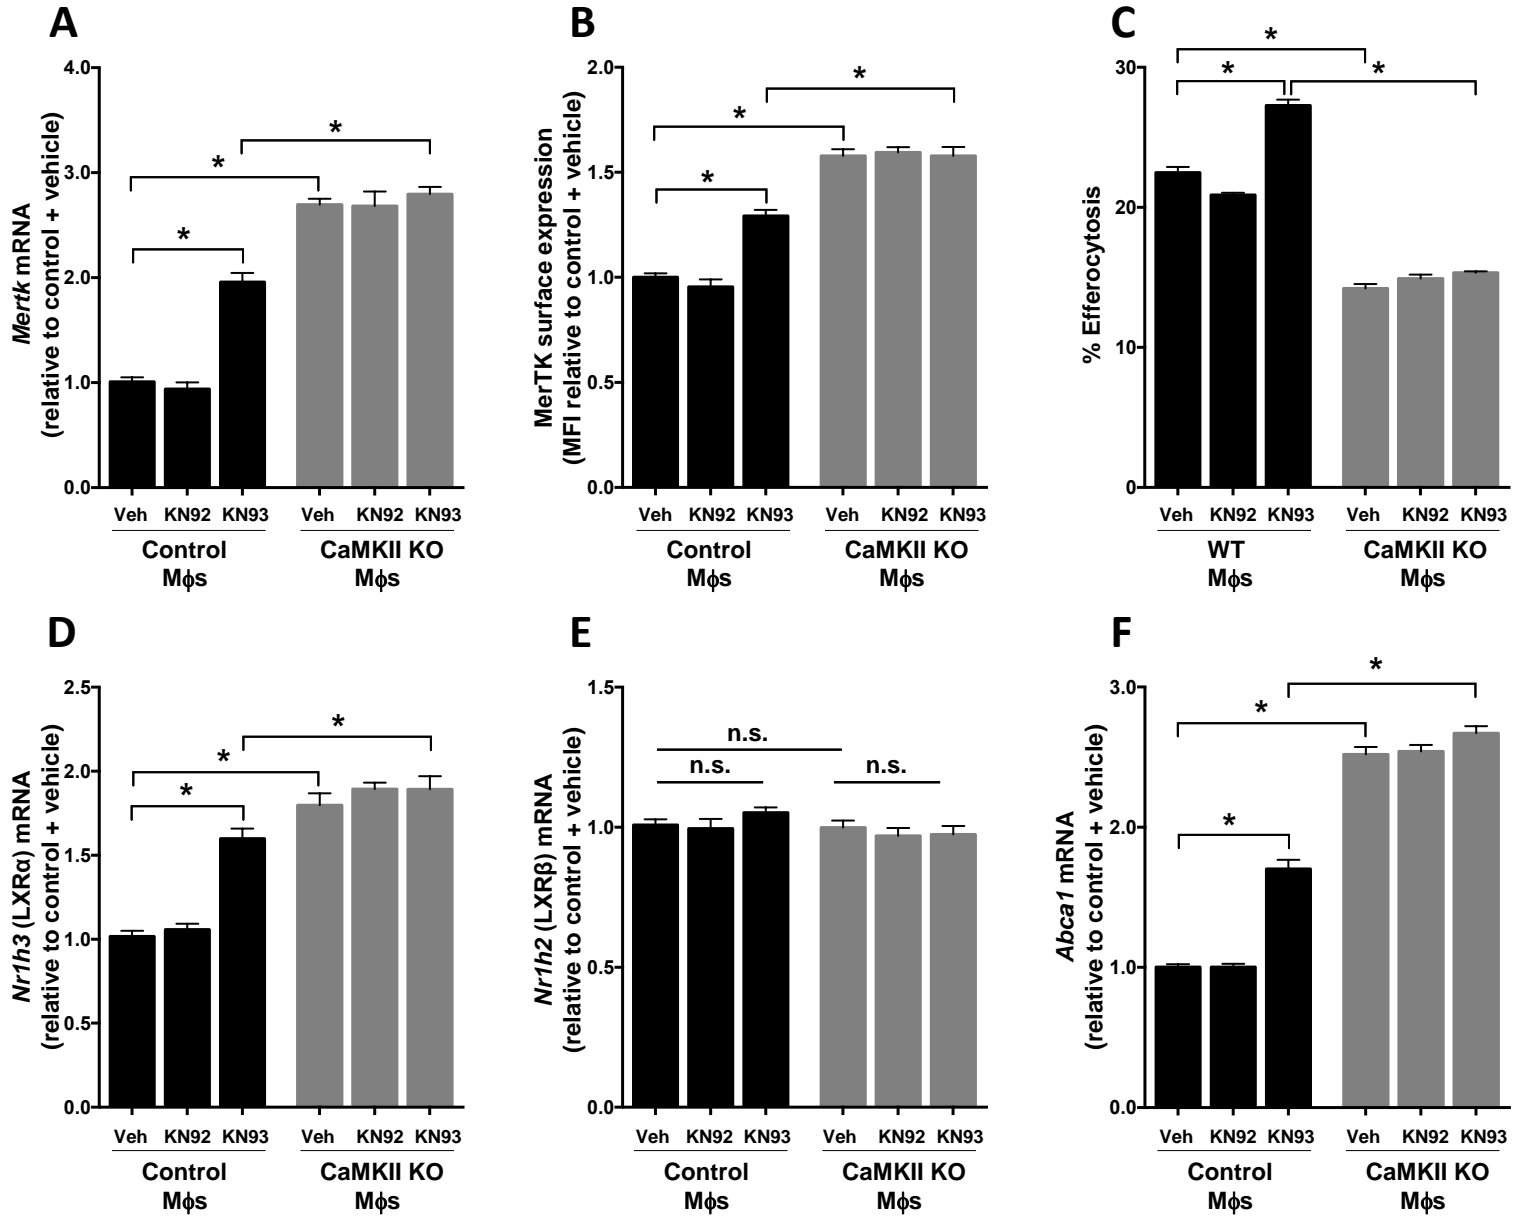

Supplement: jci-127-94735-s001.pdf [file jci-127-94735-s001.pdf]
